# Supplementary material for: Better Performance of Modified Scoring Systems to Predict the Clinical Outcomes of Vibrio Bacteremia in the Emergency Department: An Observational Study
Source: MDPI journal article supplement (doi:10.3390/jpm14040385), 2024-04-03
Supplement: s1 [file s1]

Table S1: scoring systems

## Rapid Emergency Medicine Score (REMS) [41]

| REMS                           | Score    |                |                  |                  |             |       |     |
|--------------------------------|----------|----------------|------------------|------------------|-------------|-------|-----|
| Variables                      | 0        | +1             | +2               | +3               | +4          | +5    | +6  |
| Age(years)                     | <45      |                | 45–54            | 55–64            |             | 65–74 | >74 |
| Mean arterial pressure (mmHg)  | 70–109   |                | 110–129<br>50–69 | 130–159          | >159<br>≤49 |       |     |
| Heart rate (bpm)               | 70–109   |                | 110–139<br>55–69 | 140–179<br>40–54 | >179<br>≤39 |       |     |
| Respiratory rate (breaths/min) | 12–24    | 25–34<br>10–11 | 6–9              | 35–49            | >49<br>≤5   |       |     |
| O2 saturation (%)              | >89      | 86–89          |                  | 75–85            | <75         |       |     |
| Glasgow Coma Scale             | 14 or 15 | 11–13          | 8–10             | 5–7              | 3 or 4      |       |     |

quick Sepsis-related Organ Failure Assessment (qSOFA) score [41]

| qSOFA                        | Point |
|------------------------------|-------|
| Respiratory Rate >22         | 1     |
| Systolic Blood Pressure <100 | 1     |
| Glasgow Coma Scale <14       | 1     |

Mortality in emergency department sepsis (MEDS) score [42-44]

| MEDS score                                         | Points |
|----------------------------------------------------|--------|
| 1. Terminal illness with possible death in 1 month | 6      |
| 2. Hypoxia or tachypnea                            | 3      |
| 3. Shock from sepsis                               | 3      |
| 4. Platelet count below 150,000                    | 3      |
| 5. Granulocytic bands >5% of white blood cells     | 3      |
| 6. Patient older than 65 years old                 | 3      |
| 7. Lower respiratory infection                     | 2      |
| 8. Patient is from a nursing home                  | 2      |
| 9. Mental status is altered                        | 2      |

Worthing Physiological Score (WPS) [51]

| Score                   | 0         | 1         | 2         | 3     |
|-------------------------|-----------|-----------|-----------|-------|
| Respiratory rate        | ≤19       | 20-21     | ≥22       |       |
| Pulse rate              | <101      | ≥102      |           |       |
| Systolic blood pressure | ≥100      |           | ≤99       |       |
| Temperature             | ≥35.3     |           |           | <35.3 |
| O2 saturation in air    | 96 to 100 | 94 to <96 | 92 to <94 | <92   |
| AVPU                    | Alert     |           |           | Other |
